# Supplementary material for: All-Fiber Optical Nonreciprocity Based on Parity-Time-Symmetric Fabry-Perot Resonators
Source: Research Square preprint supplement (doi:10.21203/rs.3.rs-744742/v1), 2021-08-09
Supplement: Supplementary file 1 [file fb47bf0d2b4ba08b9eacc2b4.docx]

Supplementary Information for

All-Fiber Optical Nonreciprocity Based on Parity-Time-Symmetric Fabry-Perot Resonators

Li et al.

**Supplementary Note 1**

**Construction of PT-symmetric FP Resonators**

As shown in Fig. S1, we construct a PT-symmetric system using two mutually coupled FP resonators with one being optically pumped to provide a net gain whereas the other with a net loss . The Hamiltonians of the system can be expressed as

(1)

where the Hamiltonians and represent the cases of forward and backward incidence, respectively. The symbols are Bosonic annihilation operators for FP1 and FP2 in the forward propagation direction, respectively. Similarly, correspond to the backward propagation direction. The coupling of the two FP resonators creates two supermodes and with the eigenfrequencies and given as

(2)

To implement PT symmetry in the system, we tune the localized resonance frequency of the two FP resonators to be degenerate . In particular, the critical condition of the system with balanced gain and loss () needs to be satisfied. Thus, the eigenfrequencies can be re-written as

(3)

which quantifies the interaction between the coupling strength and the gain/loss in the two FP resonators. In a PT-symmetric system, there are two different regions of the parameter space, determined by the coupling strength between the two FP resonators, and their gain and loss . When is satisfied, the system is in the unbroken PT-symmetric regime. In this condition, the two supermodes created by the coupling between the two resonators are nondegenerate. The real parts of the eigenfrequencies of the system are up- and down-shifted by respect to the initial resonance frequency . This corresponds to mode splitting in the transmission spectrum (Fig. 1c). When is satisfied, the system is in the broken PT-symmetric regime, this means the coupling between the two resonators is weak. In this condition, the eigenfrequencies become complex and share identical real parts. This corresponds to only a single resonant peak in the transmission spectrum (Fig. 1c).

**Figure S1. Two mutually coupled FP resonators for nonreciprocal light transmission.** FP1 resonates at frequency with a loss . FP2 resonates at and is optically pumped to provide a gain . The coupling strength between FP1 and FP2 is denoted by . The external coupling coefficients of FP1 and FP2 are both denoted by . Nonreciprocal light transmission measurement in **a** forward propagation configuration and **b** backward propagation configuration.

**Supplementary Note 2**

**Polarization dependence and length mismatch of the coupled FP resonators**

The three FBGs are inscribed in a single EYDF with a physical spacing between two adjacent FBGs of 10 mm. Due to the nonuniformity of the UV beam to inscribe the FBGs, the three FBGs inscribed in a polarization-independent EYDF become polarization dependent. This is confirmed by observing the transmission spectrum of the device in which two slightly separated resonance peaks are observed. In addition, due to fabrication errors, the cavity lengths of the two FP resonators are not perfectly matched, which would lead to two additional resonance peaks at slightly different locations. Therefore, we observe four resonance peaks, as shown in Figure S2a. By adjusting the polarization direction of the probe light entering the device to be in parallel with the principal axis of the FBGs, one resonance peak is eliminated, as shown in Figure S2b. This is done in the experiment by tuning PC1 in Fig. 2a of the main text.

**Figure S2. Experimentally obtained transmission.** Transmission spectra of the two coupled FP resonators **a** without adjusting the polarization direction of the probe light, and **b** with polarization direction adjustment. Resonances are observed in the reflection band (shaded brown) of the FBGs.

**Figure S3. Cavity length mismatch. a** Schematic to show the elimination of the cavity length mismatch. **b** Evolution of the transmission spectra of the FP resonators, obtained by stretching FP1 while keeping FP2 unchanged. **c** Transmission spectra of a single resonance peak at each resonant mode in the polarization 1 and polarization 2.

To accurately match the cavity lengths of the two FP resonators, we try to stretch one FP resonator while keeping the other un-stretched. A micro-positioning platform used to perform the stretch is shown in Figure S3a. First, we need to identify which FP resonator has a shorter cavity length. To do so, we stretch one cavity while monitoring the change of the two resonance peaks. In our experiment, we find that the spacing of the two resonance peaks is decreasing when FP1 is stretched, as shown in Figure S3b. This confirms that FP1 has a shorter cavity length. We then further stretch FP1 until the two resonance peaks completely overlap, as shown in Figure S3c. Once the polarization dependence and length mismatch issues are solved, only a single resonance peak at each resonant mode is observed in the transmission spectra.

**Supplementary Note 3**

**Light transmission in PT-symmetric FP resonators**

1. **Broken PT-symmetric regime**

In the main text, a description is provided to discuss the implementation of PT symmetry, which is achieved in the experiment by tuning the pumping power. To achieve nonreciprocal light transmission, the device must operate in the broken PT-symmetric regime, which is realized by making the gain/loss coefficient greater than the coupling coefficient. In the device, the coupling coefficient is determined by the transmission coefficient of FBG2 which is fixed. Therefore, to make the device operate in the broken PT-symmetric regime, we tune the pumping power to make . From the perspective of the device design and manufacturing, FBG2 is designed to have a relatively lower transmission coefficient, making the two resonators have weak coupling, which is helpful in achieving . In addition, the EYDF used to inscribe the FBGs has a high core absorption coefficient, which means that a high gain coefficient and loss coefficient can be implemented even at a short cavity length.

In the main text, we point out that the nonreciprocal behavior of the device is optical power dependent. This conclusion is verified by our experiment. For a probe light at a low input power, say -15 dBm, since the gain situation is not significant, the transmission for both directions is high with no or litter nonreciprocity, as shown in Figure S4a and S4b. For a probe light at a high input power, say 10 dBm, the forward and backward incident probe light both experience gain saturation in FP2. Thus, the transmission for both directions is low with no or litter nonreciprocity. For a probe light at a moderate input power, say 0 dBm and 1dBm, due to gain saturation the gain provided by FP2 is significantly lower for the backward incident than that for the forward input probe. Thus, good nonreciprocity is achieved, as shown in Figure S4c and S4d.

**Figure S4. Experimental transmission spectra for the device operating in the broken PT-symmetric regime.** Reciprocal transmission for the input probe power at **a.** -15 dBm and **b.** 10 dBm. Nonreciprocal transmission for the input probe power at **c.** 0 dBm and **d.** 1 dBm.

1. **Unbroken PT-symmetric regime**

When the gain/loss coefficient is smaller than the coupling coefficient, , the device is operating in the unbroken PT-symmetric regime. In this case, the gain saturation in FP2 is weakened, resulting in the reduction or fully disappearance of the nonreciprocal behavior.

The transmission behavior of the device in the unbroken PT-symmetric regime is also evaluated experimentally. We first control the pumping power to have , to make the device operating in the unbroken PT-symmetric regime. Then, the input probe power is increased. As shown in Figures S5a and S5b, the transmission spectra for the input probe powers at 0 dBm and -15 dBm for both forward and backward transmission are similar, no nonreciprocity is achieved. Note also that mode splitting is also observed due to the unbroken PT-symmetry.

**Figure S5. Experimental transmission spectra for the device operating in the unbroken PT-symmetric regime.** Transmission measurements of the device operating in the unbroken PT-symmetric regime with an input power of **a.** 0 dBm and **b.** -15 dBm. No nonreciprocity is observed.

**Supplementary Note 4**

**Performance of the device**

We further evaluate the performance of the device including the isolation ratio and the insertion loss. As shown in Figure S6a, the isolation ratio is mainly dependent on the small signal gains and the coupling strengths . We point out that a weaker coupling strength makes FP2 easier to achieve gain saturation. Meanwhile, a larger gain coefficient of the optically pumped FP2 can further improve the isolation ratio. According to the simulation results, an isolation ratio up to 33 dB can be achieved if . However, the gain is limited by the doping concentration of the EYDF used in our experiment, and an 8.58-dB isolation ratio is experimentally demonstrated.

As shown in Figure S6b, the insertion loss of our device is also numerically calculated for various small signals and coupling strengths. In the experiment, the transmission coefficient for forward propagation can be expressed as

(4)

The insertion loss of the device is defined as . Obviously, a larger gain and stronger coupling strength lead to a higher transmission or a lower insertion loss. Meanwhile, a higher transmission coefficient corresponds to a larger external coupling coefficient. Thus, the insertion loss can be further reduced by optimizing the transmission coefficients of FBG1 and FBG2. According to the simulation results, the insertion loss of the device can be reduced to close to zero.

In a word, the performance of the device can be further improved by optimizing the parameters of the FP resonators. However, there is a trade-off between the isolation ratio and the insertion loss. As shown in Figure S6, we expect the coupled resonators with lower coupling strength for higher isolation ratio, but this will result in a greater insertion loss. In addition, a higher transmission coefficient of FBG1 and FBG2 will lead to a lower insertion loss, but the decrease of the Q-factors of FP1 and FP2 will degrade the isolation ratio.

**Figure S6. Performance of the device. a** Isolation ratio as a function of the coupling strength. **b** Insertion loss as a function of the coupling strength. Results are derived from the numerical simulation of the system dynamics for varying small signal gain and coupling strength. The small signal gain is normalized to the total loss , and varies from to .
